# Supplementary material for: Do Arctic local sources of pollution influence the exposure of ringed seals (Pusa hispida) analyzed in contaminant monitoring programs?
Source: Royal Society of Chemistry journal article supplement (doi:10.1039/d4va00418c), 2025-01-01
Supplement: d4va00418c1.pdf [file d4va00418c1.pdf]

## SUPPLEMENTARY INFORMATION

### **Do Arctic local sources of pollution influence the exposure of ringed seals (*Pusa hispida*) analyzed in contaminants monitoring programs?**

Houde, M.<sup>1\*</sup>, Facciola, N.<sup>1</sup>, Routti, H.<sup>2</sup>, Vorkamp, K.<sup>3</sup>, Søndergaard, J.<sup>4</sup>, Muir, D.C.G.<sup>5</sup>

<sup>1</sup> Aquatic Contaminants Research Division, Environment and Climate Change Canada, Montreal, QC, Canada

<sup>2</sup> Norwegian Polar Institute, Fram Centre, Tromsø, Norway

<sup>3</sup> Department of Environmental Science, Aarhus University, Roskilde, Denmark

<sup>4</sup> Department of Ecoscience, Aarhus University, Roskilde, Denmark

<sup>5</sup> Aquatic Contaminants Research Division, Environment and Climate Change Canada, Burlington, ON, Canada

**Table S1.** Infrastructures and potential local sources of contamination in regions where ringed seals are collected for long-term contaminants monitoring A) Canada, B) Greenland, C) Norway. NA= Not Applicable.

| <b>A) Canada</b>                 |                                                                                                                                                                                                                                                                                                               |                                                                                                                                                                                                                                                                                      |                                                                                                                                                                                                                                       |                                                                                                                                                                                                                                   |                                                                                       |
|----------------------------------|---------------------------------------------------------------------------------------------------------------------------------------------------------------------------------------------------------------------------------------------------------------------------------------------------------------|--------------------------------------------------------------------------------------------------------------------------------------------------------------------------------------------------------------------------------------------------------------------------------------|---------------------------------------------------------------------------------------------------------------------------------------------------------------------------------------------------------------------------------------|-----------------------------------------------------------------------------------------------------------------------------------------------------------------------------------------------------------------------------------|---------------------------------------------------------------------------------------|
|                                  | <b>Nain,<br/>Labrador</b>                                                                                                                                                                                                                                                                                     | <b>Arviat,<br/>Nunavut</b>                                                                                                                                                                                                                                                           | <b>Resolute Bay,<br/>Nunavut</b>                                                                                                                                                                                                      | <b>Sachs Harbour,<br/>Northwest<br/>Territories</b>                                                                                                                                                                               | <b>Reference</b>                                                                      |
| <b>Human<br/>population size</b> |                                                                                                                                                                                                                                                                                                               |                                                                                                                                                                                                                                                                                      |                                                                                                                                                                                                                                       |                                                                                                                                                                                                                                   | NASA Socioeconomic<br>Data and Applications<br>Center (SEDAC)<br>population estimator |
| 2010                             | 1,168                                                                                                                                                                                                                                                                                                         | 2,213                                                                                                                                                                                                                                                                                | 210                                                                                                                                                                                                                                   | 112                                                                                                                                                                                                                               |                                                                                       |
| 2015                             | 1,267                                                                                                                                                                                                                                                                                                         | 2,374                                                                                                                                                                                                                                                                                | 226                                                                                                                                                                                                                                   | 111                                                                                                                                                                                                                               |                                                                                       |
| 2020                             | 1,373                                                                                                                                                                                                                                                                                                         | 2,547                                                                                                                                                                                                                                                                                | 243                                                                                                                                                                                                                                   | 111                                                                                                                                                                                                                               |                                                                                       |
| <b>Mine</b>                      | Mine closest to<br>Nain<br><b>Company:</b> Voisey's<br>Bay (Vale<br>Newfoundland and<br>Labrador Limited)<br><b>Commodity:</b><br>Nickel, copper,<br>cobalt<br><b>Type:</b> Open-pit,<br>underground,<br>concentrator.<br><b>Years of<br/>operation:</b><br>2005-present<br><b>Distance to mine:</b><br>34 km | Closest mine is in<br>Rankin Inlet<br><b>Company:</b><br>Meliadine (Agnico<br>Eagle Mines<br>Limited)<br><b>Commodity:</b><br>Gold<br><b>Type:</b> Open-pit,<br>underground,<br>concentrator<br><b>Years of<br/>operation:</b><br>2019-present<br><b>Distance to mine:</b><br>215 km | No current mine.<br><b>Company:</b> Polaris,<br>decommissioned in<br>2003-2004.<br><b>Commodity:</b> Zinc,<br>lead<br><b>Type:</b><br>Underground<br><b>Years of<br/>operation:</b><br>1981-2002<br><b>Distance to mine:</b><br>96 km | Closest mine is in<br>the Yukon<br><b>Company:</b> Dublin<br>Gulch<br><b>Commodity:</b><br>Gold<br><b>Type:</b> Open-pit,<br>concentrator<br><b>Years of<br/>operation:</b><br>2019-present<br><b>Distance to mine:</b><br>981 km | The Atlas of Canada -<br>Minerals and Mining.                                         |
| <b>Power source</b>              | <b>Company:</b><br>Newfoundland and<br>Labrador Hydro                                                                                                                                                                                                                                                         | <b>Company:</b><br>Quiliq Energy<br>Corporation                                                                                                                                                                                                                                      | <b>Company:</b><br>Quiliq Energy<br>Corporation                                                                                                                                                                                       | <b>Company:</b><br>NWT Power<br>Corporation                                                                                                                                                                                       |                                                                                       |

|                                              |                                                                                                                                                      |                                                                                                                                                                                                          |                                                                                                                                                                                                           |                                                                                                                                  |                                                                                                                                                                                                                                          |
|----------------------------------------------|------------------------------------------------------------------------------------------------------------------------------------------------------|----------------------------------------------------------------------------------------------------------------------------------------------------------------------------------------------------------|-----------------------------------------------------------------------------------------------------------------------------------------------------------------------------------------------------------|----------------------------------------------------------------------------------------------------------------------------------|------------------------------------------------------------------------------------------------------------------------------------------------------------------------------------------------------------------------------------------|
|                                              | <b>Type:</b><br>Diesel<br>9377 MWh/yr                                                                                                                | <b>Type:</b><br>Diesel<br>8661 MWh/yr                                                                                                                                                                    | <b>Type:</b><br>Diesel<br>4607 MWh/yr                                                                                                                                                                     | <b>Type:</b><br>Diesel<br>954 MWh/yr                                                                                             |                                                                                                                                                                                                                                          |
| <b>Airport</b>                               | <b>Number of flights per year:</b> 900<br><br>Current airport has three foot of buffer from the water. On-going feasibility study for a new airport. | <b>Number of flights per year:</b> 876                                                                                                                                                                   | <b>Number of flights per year:</b> 1296                                                                                                                                                                   | <b>Number of flights per year:</b> 156                                                                                           | Department of Economic Development and Transportation, Airports Division, 2023.<br><br>Jugol Faruque, 2022<br><br>Flightradar24<br><a href="https://www.flightradar24.com">https://www.flightradar24.com</a>                             |
| <b>Distant Early Warning (DEW) line site</b> | <b>Name:</b> Cape Kiglapait (LAB-3)<br><br><b>Distance:</b> 74.5 km<br><br><b>Name:</b> Big Bay (LAB-4)<br><br><b>Distance:</b> 117 km               | <b>Name:</b> Bird, Manitoba BIR-X<br><br><b>Distance:</b> 502 km                                                                                                                                         | <b>Name:</b> Matheson point (CAM-C)<br><br><b>Distance:</b> 619 km                                                                                                                                        | <b>Name:</b> Horton River (Malloch Hills; BAR-E)<br><b>Distance:</b> 229 km                                                      | Government of Canada, 2013.<br><br>GoogleEarth for distance measurements                                                                                                                                                                 |
| <b>Wastewaters</b>                           | <b>Flow:</b> 306 m <sup>3</sup> /day                                                                                                                 | <b>Flow:</b> 251 m <sup>3</sup> /day<br><br>Wastewater is transported to a sewage lagoon (close to ocean), and the lagoon slowly feeds the wastewater into a treatment wetland of 0.78 km <sup>2</sup> . | <b>Flow:</b> 917 m <sup>3</sup> /day<br><br>Wastewater flows into Resolute Bay. A new wastewater system is in progress and should be implemented by 2024. Airport has a sewage lagoon that will be closed | <b>Flow:</b> 10.63 m <sup>3</sup> /day<br><br>Wastewater is transported to a natural lake. It is unknown where this lake drains. | Bagnall et al. 2015.<br><br>George, 2020.<br><br>Wootton et al., 2008.<br><br>Nunavut Water Board, <a href="http://nwb-oen.ca">nwb-oen.ca</a><br>Inuvialuit Water Board, <a href="http://inuvwb.ca">inuvwb.ca</a><br><br>GoogleEarth for |

|                             |                                                                                                                                                          |                                                                                                     |                                                                                                                                 |                                                                                                                                                                                                                                                                                                        |                                                                                                                                                                                                    |
|-----------------------------|----------------------------------------------------------------------------------------------------------------------------------------------------------|-----------------------------------------------------------------------------------------------------|---------------------------------------------------------------------------------------------------------------------------------|--------------------------------------------------------------------------------------------------------------------------------------------------------------------------------------------------------------------------------------------------------------------------------------------------------|----------------------------------------------------------------------------------------------------------------------------------------------------------------------------------------------------|
|                             |                                                                                                                                                          |                                                                                                     | when new wastewater system is working.                                                                                          |                                                                                                                                                                                                                                                                                                        | distance measurements                                                                                                                                                                              |
| <b>Solid waste disposal</b> | <b>Distance from landfill to coastline: 0.04 km</b><br><br>The landfill is located close to the ocean without a lining or leachate remediation measures. | <b>Distance from landfill to coastline: 0.36 km</b><br><br>Open landfill next to the sewage lagoon. | <b>Distance from landfill to coastline: 1.17 km</b><br><br>Landfill is at capacity. It is close to the water and lacks fencing. | <b>Distance from landfill to coastline: 0.70 km</b><br><br>General waste goes into an active landfill cell and larger items are segregated and stored in a fenced off area. The site is within the Mary Sachs River watershed and is in close proximity to water bodies. The site drains into a creek. | Brown, 2021.<br><br>Consultation Report-Infrastructure for a Sustainable Resolute Bay, 2011.<br><a href="http://toolkit.">http://toolkit.</a>                                                      |
| <b>Other</b>                |                                                                                                                                                          |                                                                                                     | Military training facility<br><br>Weather station<br><br>Polar Continental Shelf Program accommodation and lab facilities.      |                                                                                                                                                                                                                                                                                                        | Integrated Community Sustainability Plan (ICPS) Toolkit- Resolute Bay, Government of Nunavut.<br>Template - Government of Nunavut ( <a href="http://buildingnunavut.com">buildingnunavut.com</a> ) |

| <b>B) Greenland</b>               |                                                                                                                                                                                                                                                  |                                                                                                                                                                                                                                                                                                                                                                                                                                                                               |                                |                                                                              |
|-----------------------------------|--------------------------------------------------------------------------------------------------------------------------------------------------------------------------------------------------------------------------------------------------|-------------------------------------------------------------------------------------------------------------------------------------------------------------------------------------------------------------------------------------------------------------------------------------------------------------------------------------------------------------------------------------------------------------------------------------------------------------------------------|--------------------------------|------------------------------------------------------------------------------|
|                                   | <b>Ittoqqortoormiit</b>                                                                                                                                                                                                                          | <b>Qeqertarsuaq</b>                                                                                                                                                                                                                                                                                                                                                                                                                                                           | <b>Avanersuaq/<br/>Qaanaaq</b> | <b>Reference</b>                                                             |
| <b>Human population size 2020</b> | 442                                                                                                                                                                                                                                              | 828                                                                                                                                                                                                                                                                                                                                                                                                                                                                           | 646                            | NASA Socioeconomic Data and Applications Center (SEDAC) population estimator |
| <b>Mine</b>                       | <p><b>Name:</b> Mestersvig</p> <p><b>Commodity:</b> Lead and zinc, 1956-1963</p> <p><b>Remarks:</b> Situated &gt;200 km from Ittoqqortoormiit and only local pollution with lead and zinc detected (within approx. 10-15 km from mine site).</p> | <p><b>Name:</b> Maarmorilik</p> <p><b>Commodity:</b> Lead, zinc and silver, 1973-1990</p> <p><b>Remarks:</b> Situated &gt;200 km from Qeqertarsuaq and only local pollution with lead, zinc, mercury and other metals detected (currently within approx. 10-15 km from mine site).</p> <p><b>Name:</b> Qullissat</p> <p><b>Commodity:</b> Coal, 1924-1972</p> <p><b>Remarks:</b> Situated approx. 100 km from Qeqertarsuaq. No significant pollution detected in the only</p> |                                | Søndergaard and Mosbech, 2022                                                |

|                       |                                        |                                                                                                                                              |                                                                                                        |                                                                                                                                                                                                                                                          |           |                                                                       |                       |
|-----------------------|----------------------------------------|----------------------------------------------------------------------------------------------------------------------------------------------|--------------------------------------------------------------------------------------------------------|----------------------------------------------------------------------------------------------------------------------------------------------------------------------------------------------------------------------------------------------------------|-----------|-----------------------------------------------------------------------|-----------------------|
|                       |                                        |                                                                                                                                              |                                                                                                        | environmental study from 2015.                                                                                                                                                                                                                           |           |                                                                       |                       |
| C) Norway             | Power source                           | NA                                                                                                                                           | NA                                                                                                     | NA                                                                                                                                                                                                                                                       | NA        |                                                                       |                       |
|                       | Airport                                | Svalbard Airport (whole island)                                                                                                              | Kongsfjorden                                                                                           | Airport                                                                                                                                                                                                                                                  | Isfjorden | Airport                                                               | Van Mijenfjorden      |
| Human population 2024 | Boats/Ferry                            | 100                                                                                                                                          | NA                                                                                                     | 50                                                                                                                                                                                                                                                       | NA        | Longyearbyen: ~2600                                                   |                       |
|                       | Cruise ships                           |                                                                                                                                              |                                                                                                        |                                                                                                                                                                                                                                                          |           |                                                                       |                       |
|                       | Distant Early Warning (DEW) line sites |                                                                                                                                              |                                                                                                        |                                                                                                                                                                                                                                                          |           |                                                                       |                       |
|                       | Wastewater                             | Untreated greywater is                                                                                                                       |                                                                                                        | Untreated                                                                                                                                                                                                                                                |           | Untreated greywater                                                   |                       |
| Mine                  |                                        | Type: Coal extraction is the main source of                                                                                                  | Ne-Alesund was a mining settlement that                                                                | Type: Coal is released to the environment. The local coal plant                                                                                                                                                                                          |           | is released to the environment.                                       | Nilsen, T. 2022       |
|                       | Solid waste disposal                   | Open waste burning. Dangerous waste is shipped to Denmark. Types of pollution associated with coal mining: Heavy metals (Fe, Cu, Mn, Cd, As, | During 1963-1965, it was used as a waste incinerator. Some PAH background concentrations reported from | Open waste burning year-round. Currently active mine. Dangerous waste is shipped to Denmark. Some waste is exported to a nearby incinerator in Longyearbyen and is to be closed in 2025. There is also an active mine in Barentsburg, 36 km southeast of |           | Open waste burning year-round. Dangerous waste is shipped to Denmark. | Granberg, et al. 2017 |
|                       | Recorded Spills                        | Pi and Hg, A polycyclic aromatic hydrocarbon (PAH), acid drainage from coal, pyrite, siderite, and ankerite.                                 |                                                                                                        |                                                                                                                                                                                                                                                          |           |                                                                       |                       |
|                       | Power source                           | The main source is burning diesel.                                                                                                           |                                                                                                        |                                                                                                                                                                                                                                                          |           | Longyearbyen switched from coal to diesel burning in 2023.            |                       |

|                                               |                                                                                                                                                    |                        |                                                                                                                                                                                                                                                                    |    |                        |
|-----------------------------------------------|----------------------------------------------------------------------------------------------------------------------------------------------------|------------------------|--------------------------------------------------------------------------------------------------------------------------------------------------------------------------------------------------------------------------------------------------------------------|----|------------------------|
|                                               | Svalbard wants to be zero emissions in the future through a combination of solar panels, windmills, bioenergy, geothermal, and battery mega-packs. |                        | Barentsburg has an active coal power plant.                                                                                                                                                                                                                        |    |                        |
| <b>Airport</b>                                |                                                                                                                                                    | Airport in Ny-Alesund. | <p>Airport in Longyearbyen.</p> <p>There has been an extensive cleaning in Longyearbyen airport in 2023 with the removal of 17800 m<sup>3</sup> of contaminated soil. The estimated amount of PFAS was 32 kg.</p> <p>Barentsburg and Pyramiden have heliports.</p> |    |                        |
| <b>Boats/Ferry/Cruises</b>                    | NA                                                                                                                                                 | NA                     | NA                                                                                                                                                                                                                                                                 | NA |                        |
| <b>Distant Early Warning (DEW) line sites</b> | NA                                                                                                                                                 | NA                     | NA                                                                                                                                                                                                                                                                 | NA |                        |
| <b>Wastewater</b>                             | Small treatment plant at the Polish research station in Hornsund and a                                                                             |                        | Evidence of heavy metals in the water system because of wastewater.                                                                                                                                                                                                |    | Kalinowska et al. 2020 |

|                             |                                                                                                                                                                                                                                                                                                                          |                                                                                                                                                                           |  |  |                                                                              |
|-----------------------------|--------------------------------------------------------------------------------------------------------------------------------------------------------------------------------------------------------------------------------------------------------------------------------------------------------------------------|---------------------------------------------------------------------------------------------------------------------------------------------------------------------------|--|--|------------------------------------------------------------------------------|
|                             | <p>system installed in 2015 in Ny-Alesund.</p> <p>Up to November 2022, untreated sewage from Longyearbyen was discharged into the fjord (2 km off the coast). Mechanical water treatment was installed in 2022.</p>                                                                                                      |                                                                                                                                                                           |  |  |                                                                              |
| <b>Solid waste disposal</b> | <p>Most of the garbage and waste from Longyearbyen is sent to mainland Norway for incineration.</p> <p>There is a dumpsite in Adventdalen. It receives inert materials and some solid waste and ash for the coal power station.</p> <p>Heavy metal concentrations above the limit have been found at the dumpsite by</p> | <p>The old dumpsite at Thiisbukta is one of the more extensive contamination sources in Ny-Alesund. High levels of Hg, pesticides, PAH, PCB have been detected there.</p> |  |  | <p>Granberg et al. 2017.<br/>Local contamination</p> <p>Løtveit SV. 2012</p> |



|  |                 |  |  |  |  |
|--|-----------------|--|--|--|--|
|  | Lotveit (2012). |  |  |  |  |
|--|-----------------|--|--|--|--|

## References

- Bagnall B, Forbes D, Bell T., 2015. Landscape Hazard Mapping: Arviat, Nunavut, 2014 Field Report. 10.13140/RG.2.1.4114.6083.
- Brown, B. 2021. Garbage in the water: How old landfills are harming Inuit communities' marine food chains. CBC news. <https://www.cbc.ca/news/canada/north/garbage-in-the-water-landfills-inuit-communities-1.5962102>
- Consultation Report - Infrastructure for a Sustainable Resolute Bay. 2011. Aarluk Consulting Inc. [http://toolkit.buildingnunavut.com/ICSP/Resolute%20Bay/Resolute%20Bay%20ICISP%20Volume%20%20Final%20\(2011-04-05\).pdf](http://toolkit.buildingnunavut.com/ICSP/Resolute%20Bay/Resolute%20Bay%20ICISP%20Volume%20%20Final%20(2011-04-05).pdf) P:\Projects\GOVERNMENT OF
- Department of Economic Development and Transportation, Airports Division. 2023. Canada: the Government of Nunavut. <https://www.gov.nu.ca/en/departement-economic-development-and-transportation>
- George, J. 2020. Resolute Bay set to see more water and sewer upgrades. Nunatsiaq News. <https://nunatsiaq.com/stories/article/high-arctic-communitys-piped-system-undergoes-additional-overhaul/>
- Government of Canada. 2013. The Distant Early Warning Line: An Environmental Legacy Project. Canada. <https://www.canada.ca/en/departement-national-defence/corporate/video/other/distant-early-warning-line-an-environmental-legacy-project.html>
- Granberg, Ask, Gabrielsen. 2017. Local contamination in Svalbard. Overview and suggestions for remediation actions. Kortrapport / Brief Report no. 044.
- Jugol Faruque, R. 2022. Feasibility studies for a new airport in Nain to be completed by 2024. CBC Newfoundland and Labrador. <https://www.cbc.ca/news/canada/newfoundland-labrador/nunatsiavut-labrador-nain-airport-1.6574817>
- Kalinowska, A., Szopinska, M., Chmiel, S. Konczak, M., Polkowska, Z, Artichowicz, W., Jankowska, K., Nowak, A., Łuczkiewicz, A. 2020. Heavy Metals in a High Arctic Fiord and Their Introduction with the Wastewater: A Case Study of Adventfjorden-Longyearbyen System, Svalbard. Water 12: 794. doi:10.3390/w12030794
- Løtveit SV. 2012. Deponiet i Adventdalen. En vurdering av spredning av forurensning og permafrostens egenskaper som bunntetting. MSc Thesis, Studieprogram for geofag og petroleumsteknologi, Miljø og naturressursteknikk, Miljø-og hydrogeologi, NTNU.
- NASA Socioeconomic Data and Applications Center (SEDAC) population estimator <https://earthdata.nasa.gov/data/tools/sedac-population-estimator>
- Nilsen, T. 2022. Norway prolongs coal mining at Svalbard until 2025, The Independent Barents Observer. <https://www.thebarentsobserver.com/arctic-mining/norway-prolongs-coal-mining-at-svalbard-until-2025/103395>
- Søndergaard and Mosbech, 2022. Mining pollution in Greenland - the lesson learned: A review of 50 years of environmental studies and monitoring. Science of the Total Environment 812, 152373. <http://dx.doi.org/10.1016/j.scitotenv.2021.152373>

The Atlas of Canada - Minerals and Mining. Canada: Natural Resource Canada, 2021. Minerals and Mining, Natural Resources Canada (atlas.gc.ca)

The Atlas of Canada - Remote Communities Energy Database, Natural Resources Canada (atlas.gc.ca)

Wootton, B., Durkalec, A., Ashley, S. 2008. Canadian Council of Ministers of the environment, draft Canada-wide strategy for the management of municipal wastewater effluent: Nunavut regional impact analysis. Inuit Tapiriit Kanatami, Ottawa. <https://www.itk.ca/wp-content/uploads/2016/07/appendix-c.pdf>

**Table S2.** Chemicals included for each contaminant class used in the five distance-based redundancy analyses done using Canadian data, and ringed seal tissues analyzed.

| <b>Class of contaminants</b>            | <b>Analyzed compounds</b>                                                                                                                                                                                 | <b>Tissue type</b> |
|-----------------------------------------|-----------------------------------------------------------------------------------------------------------------------------------------------------------------------------------------------------------|--------------------|
| Organochlorine pesticides (OCPs)        | <i>p-p'</i> -DDD, <i>p-p'</i> -DDE, <i>p-p'</i> -DDT, <i>o,p</i> -DDT, <i>o,p'</i> -DDE, $\alpha$ -HCH, $\gamma$ -HCH, dieldrin, $\gamma$ -chlordane, $\alpha$ -chlordane, trans-nonachlor, cis-nonachlor | Blubber            |
| Polychlorinated biphenyls (PCBs)        | Sum tri PCB, Sum tetra PCB, Sum penta PCB, Sum hexa PCB, Sum hepta PCB, Sum octa PCB, Sum nona PCB                                                                                                        | Blubber            |
| Polybrominated diphenyl ethers (PBDEs)  | BDE 49, BDE 47, BDE 99, BDE 100, BDE 153, BDE 183, BDE 209                                                                                                                                                | Blubber            |
| Per-, polyfluoroalkyl substances (PFAS) | PFHxS, PFHpS, PFOS, PFHpA, PFOA, PFNA, PFDA, PFUnA, PFDoA, PFTriA, PFOSA                                                                                                                                  | Liver              |
| Trace elements                          | aluminum, arsenic, cadmium, copper, lead, lithium, manganese, mercury, tin, silver, zinc                                                                                                                  | Liver              |

DDT: dichlorodiphenyltrichloroethane; *p,p'*-DDE: dichlorodiphenyldichloroethylene; *p,p'*-DDD: dichlorodiphenyldichloroethane; HCB: hexachlorobenzene; PFHpS: perfluoroheptane sulfonic acid; PFHxS: perfluorohexane sulfonic acid; PFOS: perfluorooctane sulfonic acid; PFHpA: perfluoroheptanoic acid; PFOA: perfluorooctanoic acid; PFNA: perfluorononanoic acid; PFDA: perfluorodecanoic acid; PFUnA: perfluoroundecanoic acid; PFDoA: perfluorododecanoic acid; PFTriA: perfluorotridecanoic acid; PFOSA: perfluorooctane sulfonamide.

**Table S3.** Explanatory variables selected through forward selection for each distance based redundancy analysis (db-RDA) for trace metals, per-and polyfluoroalkyl substances (PFAS), polybrominated diphenyl ethers (PBDEs), organochlorine pesticides (OCPs), and polychlorinated biphenyls (PCBs). Variables that were considered are: human population size, distance to mines, power source, flights per year at airport, distance to closest military DEW line site, solid waste, wastewater, seal age, seal sex, seal size (length), and nitrogen ( $\delta^{15}\text{N}$ ) and carbon ( $\delta^{13}\text{C}$ ) isotopes.

| Contaminant group | Selected local source variables                           | Selected biological variables                                 |
|-------------------|-----------------------------------------------------------|---------------------------------------------------------------|
| Trace elements    | Power, mine, wastewater, airport, military site (dewline) | Age, sex, size, $\delta^{15}\text{N}$ , $\delta^{13}\text{C}$ |
| PFAS              | Power, wastewater, military site (DEW line sites)         | $\delta^{15}\text{N}$ , $\delta^{13}\text{C}$                 |
| PBDEs             | Power                                                     | $\delta^{15}\text{N}$ , $\delta^{13}\text{C}$                 |
| OCPs              | Power, mine, airport                                      | $\delta^{15}\text{N}$ , $\delta^{13}\text{C}$                 |
| PCBs              | Mine, wastewater, solid waste, power                      | Size, $\delta^{15}\text{N}$ , $\delta^{13}\text{C}$ , age     |

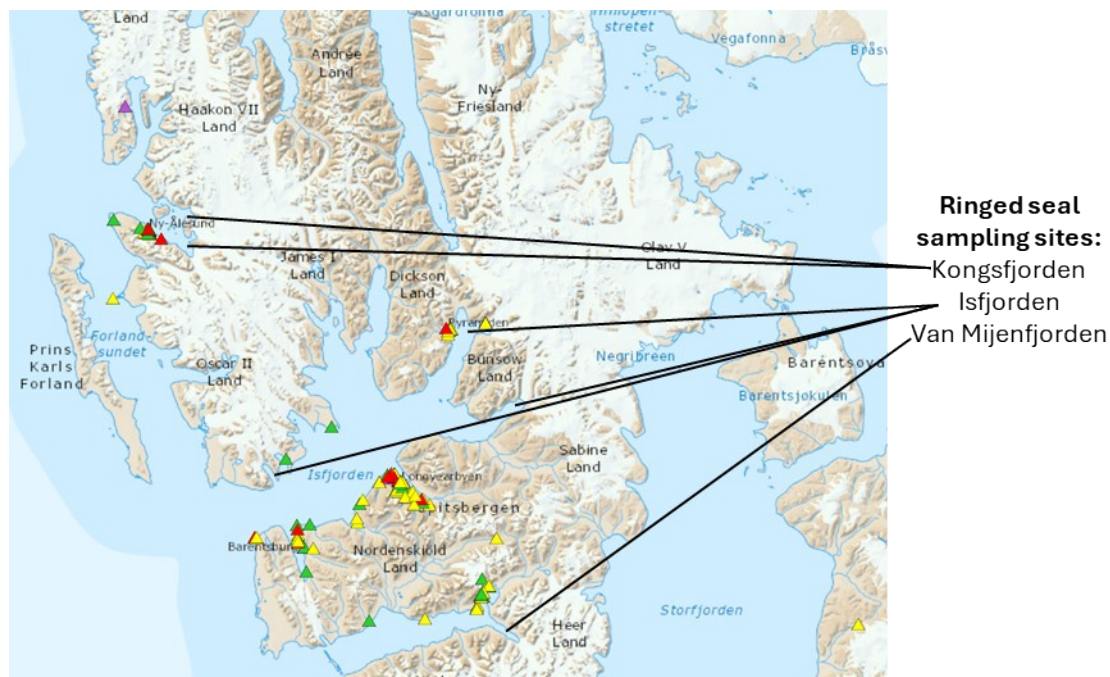

**Figure S1.** Sites of ringed seal sampling and contaminated ground (triangles) in Svalbard, Norway. The colors of the triangles refer to following: green, very little or no contamination; yellow, contamination level is currently acceptable; red, contamination level is not acceptable, actions needed; purple, situation unclear. Source: Norwegian Environmental Agency <https://grunnforurensning.miljodirektoratet.no/>
